# Supplementary material for: Development of functional human oral mucosal epithelial stem/progenitor cell sheets using a feeder-free and serum-free culture system for ocular surface reconstruction
Source: PubMed Central journal article supplement (PMC5107917; doi:10.1038/srep37173), 2016-11-14
Supplement: srep37173-s1.pdf [file srep37173-s1.pdf]

## **Supplementary Information**

### **Development of functional human oral mucosal epithelial stem/progenitor cell sheets using a feeder-free and serum-free culture system for ocular surface reconstruction**

Takahiro Nakamura, Seiichi Yokoo, Adams J Bentley, Maho Nagata, Nigel J. Fullwood, Tsutomu Inatomi, Chie Sotozono, Satoru Yamagami, Shigeru Kinoshita

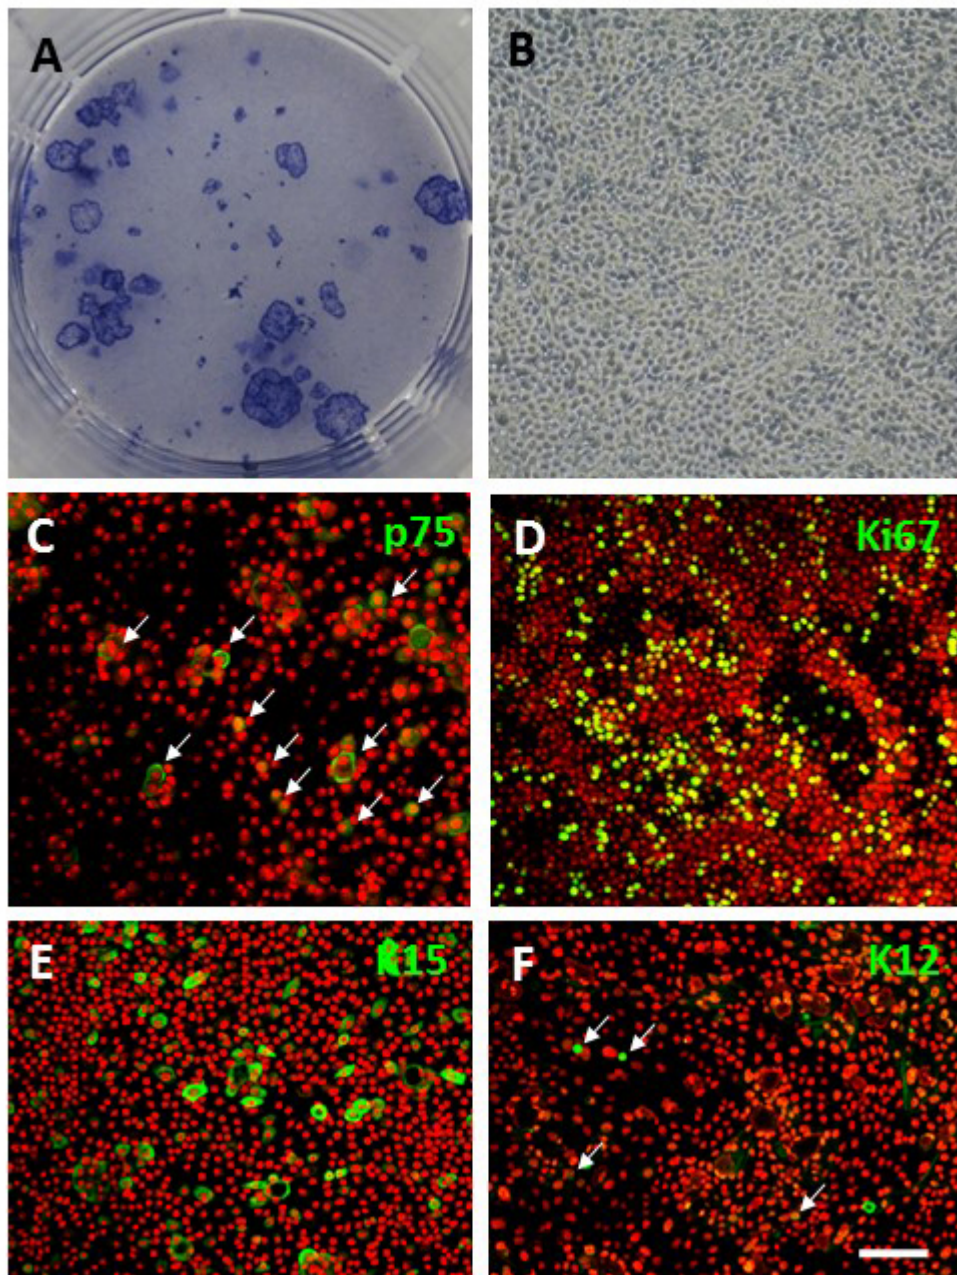

**Supplementary Figure 1.** Characterization of transplanted FFSF cultivated oral mucosal epithelial cell sheet (COMECS). Colony forming ability of transplanted FFSF COMECS (A). Phase contrast image of transplanted cells (B). Immunofluorescein staining of p75 (C, arrows), Ki67 (D), K15 (E) and K12 (F, arrows) in transplanted cultivated oral mucosal epithelial cells. Nuclei were stained with propidium iodide (red). Scale bars = 100 $\mu$ m.

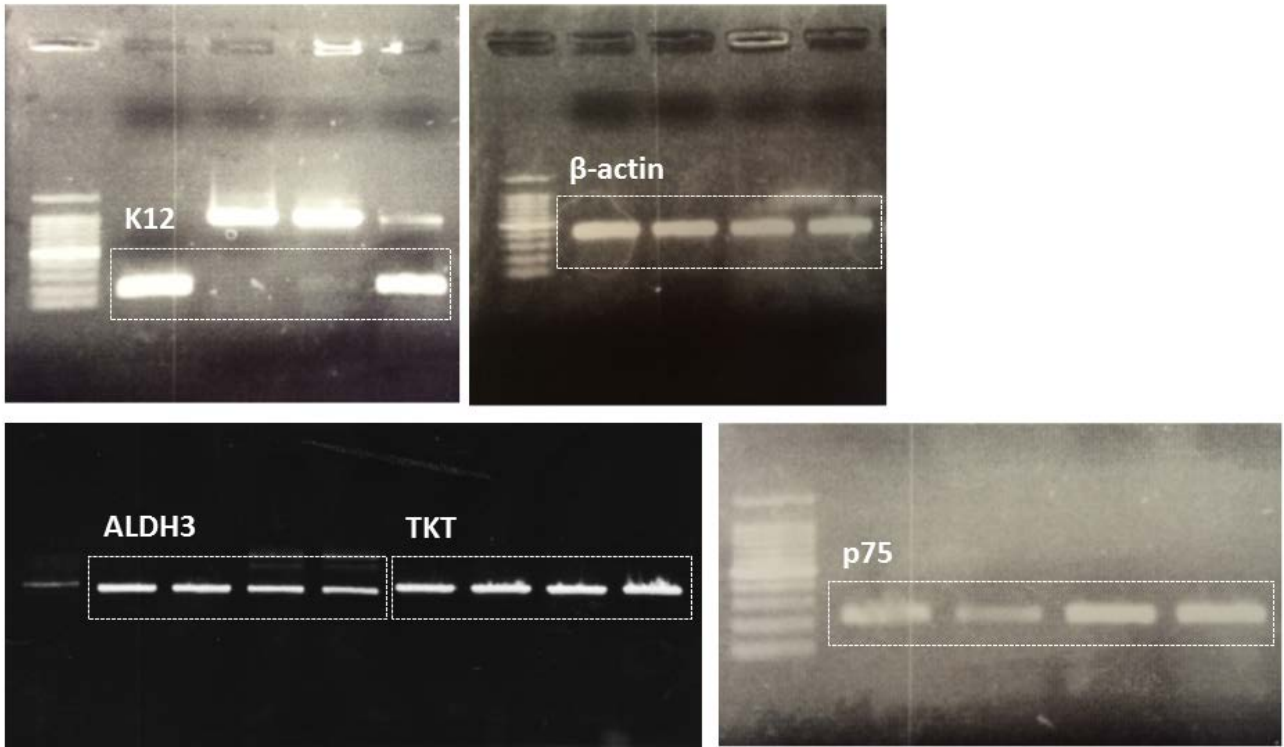

**Supplementary Figure 2.** Full-length gels of Figure 4A.

**Supplementary Table 1. Classification of clonal types**

| Donor age/gender | Each type of clone(%) |           |           |
|------------------|-----------------------|-----------|-----------|
|                  | Holoclone             | Meroclone | Paraclone |
| 30/M             | 28.6%                 | 28.6%     | 42.8%     |
| 27/M             | 16.7%                 | 16.7%     | 66.6%     |
| 38/M             | 33.3%                 | 25%       | 41.7%     |
| 37/F             | 4.2%                  | 45.8%     | 50%       |

**Supplementary Table 2. Sequences for PCR**

---

|                      |   |                       |
|----------------------|---|-----------------------|
| human K12            | F | AATCATGGGGCAGATCTTGT  |
|                      | R | AAGGTGATGGTTTGGAGGAA  |
| human ALDH3          | F | TTGCAGAGACATCCAGTGGT  |
|                      | R | TTGGTCTAGAAAGGGGTGGA  |
| human TKT            | F | CTGCTTCATCCGGACCAG    |
|                      | R | CACACTTCATACCCGCCCTA  |
| human p75            | F | TGAGTGCTGCAAAGCCTGCAA |
|                      | R | TTCATCCTGGTAGTAGCCGT  |
| human $\beta$ -actin | F | GGACTTCGAGCAAGAGATGG  |
|                      | R | ATCTGCTGGAAGGTGGACAG  |

---

F: Forward, R: Reverse
